# Supplementary material
Source: publisher figshare collection journal article supplement (https://acs.figshare.com/ndownloader/files/5370329)
Supplement: Supplementary file 1 [file 5370329]

## Sheet: Sheet1
Table S1.Crosslinked peptides identified by bottom-up analysis after crosslinking with BS3 and separation on SDS-PAGE. The conducted experiments are consecutively numbered and described by the main components of the reaction mix (A = Aur-A, B = BoraNT, P = Plk1) and their molar ratio. The analyzed gel bands are designated by the incubation time at which the analyzed aliquot was taken and by the a…
Experiment Nº			Analyzed gel band		Crosslinked precursor peptide				α peptide							β peptide							Summary
Nº	Reaction mix	Molar protein ratio	Incubation time (min)	Molecular weight acc. to SDS-PAGE (kDa)	Fragmentation method	Precursor charge	Precursor mass (Da)	Nº of PSMs	Sequence	Nº of linked residue (in peptide)	Sequence position of linked residue (in protein)	linked protein	Mass (Da)	Matched fragment ions	N score	Sequence	Nº of linked residue (in peptide)	Sequence position of linked residue (in protein)	linked protein	Mass (Da)	Matched fragment ions	N score	Matched fragment ions (total)	Identified crosslink
1	A, B, P, Mg-ATP	1:1:1	120300	15-20	ETD+HCD	5	2494.29	6	IDKDVEDKR	3	95	>Bora_NT	1116.58	21.5	1.53606e-39	QKAIEEFFTK	2	103	>Bora_NT	1239.65	23.5	4.44222e-43	45	>Bora_NT-103->Bora_NT-95
1	A, B, P, Mg-ATP	1:1:1	10,20,40	120-160	ETD+HCD	4	2494.29	2	IDKDVEDKR	8	100	>Bora_NT	1116.58	19.5	3.94038e-36	QKAIEEFFTK	2	103	>Bora_NT	1239.65	20.5	1.60753e-37	40	>Bora_NT-100->Bora_NT-103
1	A, B, P, Mg-ATP	1:1:1	10,20,40	120-160	ETD+HCD	5	2365.37	6	SLLLKPHQR	5	103	>Plk1	1090.66	17.5	7.92584e-37	GRFLGKGGFAK	6	73	>Plk1	1136.65	22.5	5.94301e-48	40	>Plk1-103->Plk1-73
1	A, B, P, Mg-ATP	1:1:1	10,20,40	120-160	ETD+HCD	4	3356.81	1	KALTEPEAR	1	158	>Plk1	1013.55	9	1.96297e-17	APADPGKAGVPGVAAPGAPAAAPPAK	7	31	>Plk1	2205.19	30	6.50502e-58	39	>Plk1-158->Plk1-31
1	A, B, P, Mg-ATP	1:1:1	10,20,40	120-160	ETD+HCD	5	2302.31	10	KALTEPEAR	1	158	>Plk1	1013.55	14.5	2.2813e-27	RSLLELHKR	8	155	>Plk1	1150.69	22.5	7.78342e-47	37	>Plk1-155->Plk1-158
1	A, B, P, Mg-ATP	1:1:1	60120300	120-160	ETD+HCD	4	2302.31	7	KALTEPEAR	1	158	>Plk1	1013.55	21	2.0998e-43	RSLLELHKR	8	155	>Plk1	1150.69	16	2.17918e-31	37	>Plk1-155->Plk1-158
1	A, B, P, Mg-ATP	1:1:1	60120300	80-90	ETD+HCD	4	2316.24	1	KALTEPEAR	1	158	>Plk1	1013.55	16.5	5.89046e-31	TMoVDKLLSSR	5	601	>Plk1	1164.62	19.5	2.28289e-36	36	>Plk1-158->Plk1-601
1	A, B, P, Mg-ATP	1:1:1	10,20,40	120-160	ETD+HCD	4	3327.79	1	EKEEPVVR	2	370	>Plk1	984.524	6	2.23251e-11	APADPGKAGVPGVAAPGAPAAAPPAK	7	31	>Plk1	2205.19	30	3.47307e-59	36	>Plk1-31->Plk1-370
1	A, B, P, Mg-ATP	1:1:1	60120300	80-90	ETD+HCD	4	2354.18	1	GAASMoMoGDVK	1	1	>Bora_NT	997.421	18.5	1.09165e-37	IKKNEYSIPK	2	276	>Plk1	1218.7	17	1.45977e-36	35.5	>Bora_NT-1->Plk1-276
1	A, B, P, Mg-ATP	1:1:1	120300	15-20	ETD+HCD	3	2063.03	3	STKLPTPGK	3	54	>Bora_NT	927.539	13.5	3.87169e-25	GAASMoMoGDVK	1	1	>Bora_NT	997.421	21.5	7.55804e-42	35	>Bora_NT-1->Bora_NT-54
1	A, B, P, Mg-ATP	1:1:1	60120300	80-90	ETD+HCD	4	2628.29	10	TMVDKLLSSR	5	601	>Plk1	1148.62	17	9.5111e-36	GAASMoMoGDVKESK	1	1	>Bora_NT	1341.59	17	9.12197e-33	34	>Bora_NT-1->Plk1-601
1	A, B, P, Mg-ATP	1:1:1	60120300	80-90	ETD+HCD	4	3356.81	1	KALTEPEAR	1	158	>Plk1	1013.55	7	4.75433e-14	APADPGKAGVPGVAAPGAPAAAPPAK	7	31	>Plk1	2205.19	26	5.62092e-53	33	>Plk1-158->Plk1-31
1	A, B, P, Mg-ATP	1:1:1	10,20,40	120-160	ETD+HCD	4	2063.2	3	KPLTVLNK	1	350	>Plk1	911.58	14	3.30355e-26	KALTEPEAR	1	158	>Plk1	1013.55	19	8.13824e-37	33	>Plk1-158->Plk1-350
1	A, B, P, Mg-ATP	1:1:1	60120300	80-90	ETD+HCD	4	2226.15	2	GAASMoMoGDVK	1	1	>Bora_NT	997.421	20	1.767e-43	SLLLKPHQR	5	103	>Plk1	1090.66	11	8.5788e-23	31	>Bora_NT-1->Plk1-103
1	A, B, P, Mg-ATP	1:1:1	10,20,40	120-160	ETD+HCD	4	2403.27	1	IDKDVEDKR	3	95	>Bora_NT	1116.58	15	1.46493e-32	TMVDKLLSSR	5	601	>Plk1	1148.62	16	2.14704e-34	31	>Bora_NT-95->Plk1-601
1	A, B, P, Mg-ATP	1:1:1	10,20,40	120-160	ETD+HCD	4	2136.15	2	EKEEPVVR	2	370	>Plk1	984.524	10.5	5.18672e-18	KALTEPEAR	1	158	>Plk1	1013.55	20.5	3.24169e-40	31	>Plk1-158->Plk1-370
1	A, B, P, Mg-ATP	1:1:1	10,20,40	120-160	ETD+HCD	4	2034.17	2	KPLTVLNK	1	350	>Plk1	911.58	14	1.21667e-26	EKEEPVVR	2	370	>Plk1	984.524	17	1.32492e-33	31	>Plk1-350->Plk1-370
1	A, B, P, Mg-ATP	1:1:1	120300	15-20	ETD+HCD	5	2565.31	5	IDKDVEDKR	3	95	>Bora_NT	1116.58	18.5	1.53736e-38	SpTKLPTPGKFR	9	60	>Bora_NT	1310.67	11.5	3.81066e-20	30	>Bora_NT-60->Bora_NT-95
1	A, B, P, Mg-ATP	1:1:1	10,20,40	120-160	ETD+HCD	4	2308.22	1	ATAPVGGPKR	9	25	>AurA	952.545	13	1.90072e-25	SKENCISGPVK	2	7	>AurA	1217.61	17	2.64655e-34	30	>AurA-25->AurA-7
1	A, B, P, Mg-ATP	1:1:1	10,20,40	120-160	ETD+HCD	5	2604.39	7	SLLLKPHQR	5	103	>Plk1	1090.66	10.5	6.27466e-19	EKMoSMEISIHR	2	109	>Plk1	1375.66	19.5	3.55109e-38	30	>Plk1-103->Plk1-109
1	A, B, P, Mg-ATP	1:1:1	10,20,40	120-160	ETD+HCD	5	3734.91	1	EKMoSMoEISIHR	2	109	>Plk1	1391.65	8	2.04802e-15	APADPGKAGVPGVAAPGAPAAAPPAK	7	31	>Plk1	2205.19	22	4.27023e-44	30	>Plk1-109->Plk1-31
1	A, B, P, Mg-ATP	1:1:1	10,20,40	120-160	ETD+HCD	4	2271.22	6	EKEEPVVR	2	370	>Plk1	984.524	10.5	5.87305e-19	TMVDKLLSSR	5	601	>Plk1	1148.62	19.5	9.22913e-39	30	>Plk1-370->Plk1-601
1	A, B, P, Mg-ATP	1:1:1	60120300	80-90	ETD+HCD	3	2149.04	3	GAASMoMoGDVK	1	1	>Bora_NT	997.421	19	1.73612e-39	KALTEPEAR	1	158	>Plk1	1013.55	10	1.28415e-19	29	>Bora_NT-1->Plk1-158
1	A, B, P, Mg-ATP	1:1:1	60120300	120-160	ETD+HCD	5	2152.26	1	FLGKGGFAK	4	73	>Plk1	923.523	17	1.89095e-36	SLLLKPHQR	5	103	>Plk1	1090.66	12	3.75278e-24	29	>Plk1-103->Plk1-73
1	A, B, P, Mg-ATP	1:1:1	10,20	15-20	ETD+HCD	3	2063.03	2	STKLPTPGK	3	54	>Bora_NT	927.539	8.5	2.02338e-15	GAASMoMoGDVK	1	1	>Bora_NT	997.421	19.5	2.42223e-40	28	>Bora_NT-1->Bora_NT-54
1	A, B, P, Mg-ATP	1:1:1	60120300	80-90	ETD+HCD	4	2136.14	3	EKEEPVVR	2	370	>Plk1	984.524	9.5	3.77272e-17	KALTEPEAR	1	158	>Plk1	1013.55	18.5	5.06875e-38	28	>Plk1-158->Plk1-370
1	A, B, P, Mg-ATP	1:1:1	10,20,40	120-160	ETD+HCD	4	2056.18	1	FLGKGGFAK	4	73	>Plk1	923.523	16	9.12621e-32	SLLELHKR	7	155	>Plk1	994.592	11	7.37152e-21	27	>Plk1-155->Plk1-73
1	A, B, P, Mg-ATP	1:1:1	60120300	120-160	ETD+HCD	4	2136.14	2	EKEEPVVR	2	370	>Plk1	984.524	11.5	2.03273e-22	KALTEPEAR	1	158	>Plk1	1013.55	15.5	1.53387e-31	27	>Plk1-158->Plk1-370
1	A, B, P, Mg-ATP	1:1:1	120300	15-20	ETD+HCD	4	2236.07	2	GAASMMoGDVK	1	1	>Bora_NT	981.426	15.5	1.7248e-31	IDKDVEDKR	3	95	>Bora_NT	1116.58	10.5	2.3329e-20	26	>Bora_NT-1->Bora_NT-95
1	A, B, P, Mg-ATP	1:1:1	60120300	80-90	ETD+HCD	4	2287.21	4	EKEEPVVR	2	370	>Plk1	984.524	8.5	1.9585e-15	TMoVDKLLSSR	5	601	>Plk1	1164.62	17.5	3.60829e-35	26	>Plk1-370->Plk1-601
1	A, B, P, Mg-ATP	1:1:1	60120300	80-90	ETD+HCD	4	2494.3	1	IDKDVEDKR	8	100	>Bora_NT	1116.58	10.5	1.48179e-20	QKAIEEFFTK	2	103	>Bora_NT	1239.65	15.5	2.09811e-32	26	>Bora_NT-100->Bora_NT-103
1	A, B, P, Mg-ATP	1:1:1	10,20,40	120-160	ETD+HCD	4	1868.05	2	QATKDAGR	4	155	>sp|A7ZHA4|DnaK E.coli	845.436	13.5	3.56943e-26	IAGLEVKR	7	166	>sp|A7ZHA4|DnaK E.coli	884.544	12.5	8.37161e-24	26	>sp|A7ZHA4|DnaK E.coli-155->sp|A7ZHA4|DnaK E.coli-166
1	A, B, P, Mg-ATP	1:1:1	120300	15-20	ETD+HCD	4	2446.16	4	GAASMoMoGDVK	1	1	>Bora_NT	997.421	15	5.21099e-32	SpTKLPTPGKFR	9	60	>Bora_NT	1310.67	10	7.75614e-20	25	>Bora_NT-1->Bora_NT-60
1	A, B, P, Mg-ATP	1:1:1	60120300	120-160	ETD+HCD	4	2117.19	1	EKEEPVVR	2	370	>Plk1	984.524	11.5	4.12117e-21	SLLELHKR	7	155	>Plk1	994.592	13.5	9.4296e-26	25	>Plk1-155->Plk1-370
1	A, B, P, Mg-ATP	1:1:1	60120300	120-160	ETD+HCD	4	2287.21	2	EKEEPVVR	2	370	>Plk1	984.524	8.5	1.75747e-15	TMoVDKLLSSR	5	601	>Plk1	1164.62	16.5	8.00498e-33	25	>Plk1-370->Plk1-601
1	A, B, P, Mg-ATP	1:1:1	60120300	80-90	ETD+HCD	4	2034.17	2	KPLTVLNK	1	350	>Plk1	911.58	14	8.59421e-30	EKEEPVVR	2	370	>Plk1	984.524	10	4.8805e-20	24	>Plk1-350->Plk1-370
1	A, B, P, Mg-ATP	1:1:1	60120300	80-90	ETD+HCD	3	2088.03	5	GAASMMGDVK	1	1	>Bora_NT	965.431	15	6.06935e-31	EKEEPVVR	2	370	>Plk1	984.524	9	9.62922e-18	24	>Bora_NT-1->Plk1-370
1	A, B, P, Mg-ATP	1:1:1	60120300	80-90	ETD+HCD	4	3327.79	1	EKEEPVVR	2	370	>Plk1	984.524	5	7.1629e-10	APADPGKAGVPGVAAPGAPAAAPPAK	7	31	>Plk1	2205.19	19	6.8353e-37	24	>Plk1-31->Plk1-370
1	A, B, P, Mg-ATP	1:1:1	10,20,40	120-160	ETD+HCD	4	2117.18	1	EKEEPVVR	2	370	>Plk1	984.524	9.5	7.28608e-17	SLLELHKR	7	155	>Plk1	994.592	14.5	1.69194e-28	24	>Plk1-155->Plk1-370
1	A, B, P, Mg-ATP	1:1:1	10,20,40	120-160	ETD+HCD	4	2467.3	1	TMoVDKLLSSR	5	601	>Plk1	1164.62	12	9.76713e-24	TMoVDKLLSSR	5	601	>Plk1	1164.62	12	9.76713e-24	24	>Plk1-601->Plk1-601
1	A, B, P, Mg-ATP	1:1:1	60120300	120-160	ETD+HCD	4	2034.17	2	KPLTVLNK	1	350	>Plk1	911.58	13	8.62146e-27	EKEEPVVR	2	370	>Plk1	984.524	11	5.45146e-22	24	>Plk1-350->Plk1-370
1	A, B, P, Mg-ATP	1:1:1	60120300	120-160	ETD+HCD	4	1868.05	2	QATKDAGR	4	155	>sp|A7ZHA4|DnaK E.coli	845.436	11.5	1.41284e-22	IAGLEVKR	7	166	>sp|A7ZHA4|DnaK E.coli	884.544	11.5	1.41284e-22	23	>sp|A7ZHA4|DnaK E.coli-155->sp|A7ZHA4|DnaK E.coli-166
1	A, B, P, Mg-ATP	1:1:1	60120300	80-90	ETD+HCD	4	2675.42	4	TMoVDKLLSSR	5	601	>Plk1	1164.62	11.5	3.60911e-21	IDKDVEDKRQK	8	100	>Bora_NT	1372.73	10.5	6.72664e-19	22	>Bora_NT-100->Plk1-601
1	A, B, P, Mg-ATP	1:1:1	60120300	80-90	ETD+HCD	4	3684.85	2	GAASMoMoGDVKESK	1	1	>Bora_NT	1341.59	6	2.99065e-11	APADPGKAGVPGVAAPGAPAAAPPAK	7	31	>Plk1	2205.19	16	7.99813e-32	22	>Bora_NT-1->Plk1-31
1	A, B, P, Mg-ATP	1:1:1	60120300	120-160	ETD+HCD	4	2728.42	1	QATKDAGR	4	155	>sp|A7ZHA4|DnaK E.coli	845.436	7	1.1124e-14	ITIKASSGLNEDEIQK	4	502	>sp|A7ZHA4|DnaK E.coli	1744.92	15	4.2957e-31	22	>sp|A7ZHA4|DnaK E.coli-155->sp|A7ZHA4|DnaK E.coli-502
1	A, B, P, Mg-ATP	1:1:1	120300	15-20	ETD+HCD	5	2425.33	1	LPTPGKFR	6	60	>Bora_NT	914.534	8.5	3.29547e-15	IDKDVEDKRQK	8	100	>Bora_NT	1372.73	13	3.31794e-25	21.5	>Bora_NT-100->Bora_NT-60
1	A, B, P, Mg-ATP	1:1:1	120300	15-20	ETD+HCD	3	2592.22	16	GAASMMGDVK	1	1	>Bora_NT	965.431	8	1.82458e-14	ESKMoQITPETPGR	3	13	>Bora_NT	1488.72	13	6.77033e-24	21	>Bora_NT-1->Bora_NT-13
1	A, B, P, Mg-ATP	1:1:1	10,20,40	120-160	ETD+HCD	4	1935.11	1	ELQKLSK	4	226	>AurA	844.502	10	1.23848e-19	ATAPVGGPKR	9	25	>AurA	952.545	11	2.7803e-20	21	>AurA-226->AurA-25
1	A, B, P, Mg-ATP	1:1:1	10,20,40	120-160	ETD+HCD	4	2798.53	2	LKAS	2	613	>Plk1	417.259	4	3.64614e-08	GLENPLPERPREKEEPVVR	13	370	>Plk1	2243.2	17	8.41527e-32	21	>Plk1-370->Plk1-613
1	A, B, P, Mg-ATP	1:1:1	60120300	120-160	ETD+HCD	5	2620.38	3	SLLLKPHQR	5	103	>Plk1	1090.66	8.5	1.25183e-15	EKMoSMoEISIHR	2	109	>Plk1	1391.65	12.5	2.76174e-23	21	>Plk1-103->Plk1-109
1	A, B, P, Mg-ATP	1:1:1	10,20	15-20	ETD+HCD	3	2624.21	30	GAASMoMoGDVK	1	1	>Bora_NT	997.421	8	5.57871e-15	ESKMoQITPETPGR	3	13	>Bora_NT	1488.72	12	2.02916e-23	20	>Bora_NT-1->Bora_NT-13
1	A, B, P, Mg-ATP	1:1:1	60120300	80-90	ETD+HCD	4	2146.21	1	SLLELHKR	7	155	>Plk1	994.592	9	1.5699e-18	KALTEPEAR	1	158	>Plk1	1013.55	11	6.94948e-23	20	>Plk1-155->Plk1-158
1	A, B, P, Mg-ATP	1:1:1	60120300	80-90	ETD+HCD	4	1868.05	1	QATKDAGR	4	155	>sp|A7ZHA4|DnaK E.coli	845.436	9.5	6.95133e-18	IAGLEVKR	7	166	>sp|A7ZHA4|DnaK E.coli	884.544	10.5	3.00209e-20	20	>sp|A7ZHA4|DnaK E.coli-155->sp|A7ZHA4|DnaK E.coli-166
1	A, B, P, Mg-ATP	1:1:1	60120300	80-90	ETD+HCD	3	1539.85	1	LKAS	2	613	>Plk1	417.259	5	1.42742e-08	EKEEPVVR	2	370	>Plk1	984.524	15	5.2015e-27	20	>Plk1-370->Plk1-613
1	A, B, P, Mg-ATP	1:1:1	10,20,40	120-160	ETD+HCD	3	2576.23	8	GAASMMGDVK	1	1	>Bora_NT	965.431	8	1.09771e-14	ESKMQITPETPGR	3	13	>Bora_NT	1472.73	12	2.04049e-22	20	>Bora_NT-1->Bora_NT-13
1	A, B, P, Mg-ATP	1:1:1	60120300	120-160	ETD+HCD	4	2316.24	1	KALTEPEAR	1	158	>Plk1	1013.55	9.5	8.88858e-19	TMoVDKLLSSR	5	601	>Plk1	1164.62	10.5	2.25466e-20	20	>Plk1-158->Plk1-601
1	A, B, P, Mg-ATP	1:1:1	60120300	80-90	ETD+HCD	3	2608.22	15	GAASMMoGDVK	1	1	>Bora_NT	981.426	8	1.71175e-14	ESKMoQITPETPGR	3	13	>Bora_NT	1488.72	11	4.94093e-20	19	>Bora_NT-1->Bora_NT-13
1	A, B, P, Mg-ATP	1:1:1	60120300	120-160	ETD+HCD	3	1724.98	1	LKAS	2	613	>Plk1	417.259	4	2.20614e-08	RKALTEPEAR	2	158	>Plk1	1169.65	15	2.5119e-32	19	>Plk1-158->Plk1-613
1	A, B, P, Mg-ATP	1:1:1	60120300	120-160	ETD+HCD	3	2624.21	5	GAASMoMoGDVK	1	1	>Bora_NT	997.421	6	8.69367e-11	ESKMoQITPETPGR	3	13	>Bora_NT	1488.72	12	1.07286e-23	18	>Bora_NT-1->Bora_NT-13
1	A, B, P, Mg-ATP	1:1:1	10,20,40	120-160	ETD+HCD	4	2143.25	1	ATAPVGGPKR	9	25	>AurA	952.545	6	6.00783e-11	ITLLKYFR	5	492	>Plk1	1052.64	11	1.8466e-23	17	>AurA-25->Plk1-492
1	A, B, P, Mg-ATP	1:1:1	60120300	120-160	ETD+HCD	3	2300.11	1	GAASMoMoGDVK	1	1	>Bora_NT	997.421	6	7.50279e-11	TMoVDKLLSSR	5	601	>Plk1	1164.62	11	1.23614e-22	17	>Bora_NT-1->Plk1-601
1	A, B, P, Mg-ATP	1:1:1	10,20,40	120-160	ETD+HCD	4	2099.15	1	ELQKLSK	4	226	>AurA	844.502	6.5	3.79037e-11	IDKDVEDKR	8	100	>Bora_NT	1116.58	9.5	5.36324e-17	16	>AurA-226->Bora_NT-100
1	A, B, P, Mg-ATP	1:1:1	60120300	80-90	ETD+HCD	5	2620.38	1	SLLLKPHQR	5	103	>Plk1	1090.66	6.5	3.92125e-12	EKMoSMoEISIHR	2	109	>Plk1	1391.65	8.5	1.09229e-15	15	>Plk1-103->Plk1-109
2	A, B, P, Mg-ATP	1:1:1	300	80-90	ETD+HCD	5	3433.92	2	SLLLKPHQR	5	103	>Plk1	1090.66	6	2.45667e-11	APADPGKAGVPGVAAPGAPAAAPPAK	7	31	>Plk1	2205.19	31	1.89076e-60	37	>Plk1-103->Plk1-31
2	A, B, P, Mg-ATP	1:1:1	300	80-90	ETD+HCD	5	3337.85	1	SLLELHKR	7	155	>Plk1	994.592	6	3.51286e-11	APADPGKAGVPGVAAPGAPAAAPPAK	7	31	>Plk1	2205.19	30	2.58798e-58	36	>Plk1-155->Plk1-31
2	A, B, P, Mg-ATP	1:1:1	300	80-90	ETD+HCD	4	3356.81	1	KALTEPEAR	1	158	>Plk1	1013.55	9	4.82152e-18	APADPGKAGVPGVAAPGAPAAAPPAK	7	31	>Plk1	2205.19	26	1.2162e-50	35	>Plk1-158->Plk1-31
2	A, B, P, Mg-ATP	1:1:1	300	80-90	ETD+HCD	4	3243.75	1	EKEEPVVR	2	370	>Plk1	984.524	8	8.72268e-16	NEYSIPKHINPVAASLIQK	7	284	>Plk1	2121.16	24	2.95524e-48	32	>Plk1-284->Plk1-370
2	A, B, P, Mg-ATP	1:1:1	300	80-90	ETD+HCD	4	2365.37	5	SLLLKPHQR	5	103	>Plk1	1090.66	17	1.02416e-33	GRFLGKGGFAK	6	73	>Plk1	1136.65	23	2.52609e-46	40	>Plk1-103->Plk1-73
2	A, B, P, Mg-ATP	1:1:1	300	80-90	ETD+HCD	4	2297.27	6	SLLELHKR	7	155	>Plk1	994.592	12.5	1.91617e-23	TMoVDKLLSSR	5	601	>Plk1	1164.62	22.5	4.83311e-45	35	>Plk1-155->Plk1-601
2	A, B, P, Mg-ATP	1:1:1	300	80-90	ETD+HCD	4	2204.25	2	KALTEPEAR	1	158	>Plk1	1013.55	20.5	7.88422e-38	ITLLKYFR	5	492	>Plk1	1052.64	21.5	3.44036e-41	42	>Plk1-158->Plk1-492
2	A, B, P, Mg-ATP	1:1:1	300	80-90	ETD+HCD	5	3702.93	3	EKMSMEISIHR	2	109	>Plk1	1359.66	8.5	1.57823e-15	APADPGKAGVPGVAAPGAPAAAPPAK	7	31	>Plk1	2205.19	21.5	1.72652e-40	30	>Plk1-109->Plk1-31
2	A, B, P, Mg-ATP	1:1:1	300	80-90	ETD+HCD	5	2458.41	12	RSLLELHKR	8	155	>Plk1	1150.69	21	7.21884e-42	RKALTEPEAR	2	158	>Plk1	1169.65	21	6.53568e-41	42	>Plk1-155->Plk1-158
2	A, B, P, Mg-ATP	1:1:1	300	80-90	ETD+HCD	4	3244.63	1	KALTEPEAR	1	158	>Plk1	1013.55	13	6.20246e-26	DGTESYLTVSSHPNSLMKK	18	486	>Plk1	2093.01	21	5.82283e-39	34	>Plk1-158->Plk1-486
2	A, B, P, Mg-ATP	1:1:1	300	80-90	ETD+HCD	5	3582.91	4	IKKNEYSIPK	2	276	>Plk1	1218.7	13	2.68867e-26	KKTpLCGTPNYIAPEVLSKK	18	237	>Plk1	2226.15	20.5	9.45888e-38	33.5	>Plk1-237->Plk1-276
2	A, B, P, Mg-ATP	1:1:1	300	80-90	ETD+HCD	4	2620.38	11	SLLLKPHQR	5	103	>Plk1	1090.66	11.5	9.8337e-22	EKMoSMoEISIHR	2	109	>Plk1	1391.65	20.5	7.37655e-41	32	>Plk1-103->Plk1-109
2	A, B, P, Mg-ATP	1:1:1	300	80-90	ETD+HCD	4	2377.35	4	SLLLKPHQR	5	103	>Plk1	1090.66	10.5	5.61638e-19	TMVDKLLSSR	5	601	>Plk1	1148.62	20.5	2.93511e-42	31	>Plk1-103->Plk1-601
2	A, B, P, Mg-ATP	1:1:1	300	80-90	ETD+HCD	4	3049.52	1	EKEEPVVR	2	370	>Plk1	984.524	7.5	1.4037e-13	LSLLEEYGCCKELASR	11	586	>Plk1	1926.92	20.5	1.59535e-40	28	>Plk1-370->Plk1-586
2	A, B, P, Mg-ATP	1:1:1	300	80-90	ETD+HCD	4	2300.24	5	KALTEPEAR	1	158	>Plk1	1013.55	19.5	1.83482e-39	TMVDKLLSSR	5	601	>Plk1	1148.62	19.5	1.34872e-38	39	>Plk1-158->Plk1-601
2	A, B, P, Mg-ATP	1:1:1	300	80-90	ETD+HCD	5	3394.82	3	KALTEPEAR	1	158	>Plk1	1013.55	14.5	3.7927e-29	GLENPLPERPREKEEPVVR	13	370	>Plk1	2243.2	19.5	1.23329e-35	34	>Plk1-158->Plk1-370
2	A, B, P, Mg-ATP	1:1:1	300	80-90	ETD+HCD	4	2299.16	2	SpASNRLKAS	7	613	>Plk1	1012.47	11	2.02497e-20	TMVDKLLSSR	5	601	>Plk1	1148.62	18	9.50253e-37	29	>Plk1-601->Plk1-613
2	A, B, P, Mg-ATP	1:1:1	300	80-90	ETD+HCD	3	1724.98	2	LKAS	2	613	>Plk1	417.259	5	2.42719e-10	RKALTEPEAR	2	158	>Plk1	1169.65	17	8.30974e-36	22	>Plk1-158->Plk1-613
2	A, B, P, Mg-ATP	1:1:1	300	80-90	ETD+HCD	4	3078.54	1	KALTEPEAR	1	158	>Plk1	1013.55	11.5	4.41179e-22	LSLLEEYGCCKELASR	11	586	>Plk1	1926.92	16.5	2.22005e-30	28	>Plk1-158->Plk1-586
2	A, B, P, Mg-ATP	1:1:1	300	80-90	ETD+HCD	4	3065.6	1	KALTEPEAR	1	158	>Plk1	1013.55	14	1.42268e-30	NYMSEHLLKAGANITPR	9	504	>Plk1	1913.98	16	2.3939e-31	30	>Plk1-158->Plk1-504
2	A, B, P, Mg-ATP	1:1:1	300	80-90	ETD+HCD	4	2056.18	2	FLGKGGFAK	4	73	>Plk1	923.523	18	3.68313e-37	SLLELHKR	7	155	>Plk1	994.592	15	1.10135e-30	33	>Plk1-155->Plk1-73
2	A, B, P, Mg-ATP	1:1:1	300	80-90	ETD+HCD	4	3241.66	2	SLLELHKR	7	155	>Plk1	994.592	6	1.97836e-11	DGTESYLTVSSHPNSLMoKK	18	486	>Plk1	2109	15	1.53084e-27	21	>Plk1-155->Plk1-486
2	A, B, P, Mg-ATP	1:1:1	300	80-90	ETD+HCD	4	2117.18	2	EKEEPVVR	2	370	>Plk1	984.524	13.5	1.97493e-24	SLLELHKR	7	155	>Plk1	994.592	14.5	1.06619e-26	28	>Plk1-155->Plk1-370
2	A, B, P, Mg-ATP	1:1:1	300	80-90	ETD+HCD	4	3401.85	1	KALTEPEAR	1	158	>Plk1	1013.55	11.5	1.22406e-22	KPLTpVLNKGLENPLPERPR	8	357	>Plk1	2250.22	14.5	3.11067e-25	26	>Plk1-158->Plk1-357
2	A, B, P, Mg-ATP	1:1:1	300	80-90	ETD+HCD	4	3372.81	2	EKEEPVVR	2	370	>Plk1	984.524	5	6.05057e-09	KPLTpVLNKGLENPLPERPR	8	357	>Plk1	2250.22	14	1.52521e-24	19	>Plk1-357->Plk1-370
2	A, B, P, Mg-ATP	1:1:1	300	80-90	ETD+HCD	5	3545.89	6	TMoVDKLLSSR	5	601	>Plk1	1164.62	20.5	3.71726e-43	GLENPLPERPREKEEPVVR	13	370	>Plk1	2243.2	13.5	7.63557e-23	34	>Plk1-370->Plk1-601
2	A, B, P, Mg-ATP	1:1:1	300	80-90	ETD+HCD	5	3155.65	2	SLLLKPHQR	5	103	>Plk1	1090.66	5.5	2.7309e-09	LSLLEEYGCCKELASR	11	586	>Plk1	1926.92	13.5	3.04985e-25	19	>Plk1-103->Plk1-586
2	A, B, P, Mg-ATP	1:1:1	300	80-90	ETD+HCD	3	1691.97	1	LKAS	2	613	>Plk1	417.259	4.5	6.15802e-08	GRFLGKGGFAK	6	73	>Plk1	1136.65	13.5	2.48999e-25	18	>Plk1-613->Plk1-73
2	A, B, P, Mg-ATP	1:1:1	300	80-90	ETD+HCD	4	2505.38	1	TMVDKLLSSR	5	601	>Plk1	1148.62	18	2.29082e-38	IKKNEYSIPK	2	276	>Plk1	1218.7	13	4.21851e-26	31	>Plk1-276->Plk1-601
2	A, B, P, Mg-ATP	1:1:1	300	80-90	ETD+HCD	4	2315.37	1	EVFAGKIVPK	6	94	>Plk1	1086.64	10.5	3.07265e-19	SLLLKPHQR	5	103	>Plk1	1090.66	12.5	1.96641e-24	23	>Plk1-103->Plk1-94
2	A, B, P, Mg-ATP	1:1:1	300	80-90	ETD+HCD	4	2034.16	3	KPLTVLNK	1	350	>Plk1	911.58	14	2.40845e-28	EKEEPVVR	2	370	>Plk1	984.524	12	1.3217e-23	26	>Plk1-350->Plk1-370
2	A, B, P, Mg-ATP	1:1:1	300	80-90	ETD+HCD	3	2198.27	1	KPLTVLNK	1	350	>Plk1	911.58	7	1.56886e-12	TMVDKLLSSR	5	601	>Plk1	1148.62	11	2.18418e-20	18	>Plk1-350->Plk1-601
2	A, B, P, Mg-ATP	1:1:1	300	80-90	ETD+HCD	4	3465.77	1	IKKNEYSIPK	2	276	>Plk1	1218.7	12	1.17464e-24	DGTESYLTVSSHPNSLMoKK	18	486	>Plk1	2109	10.5	6.87828e-17	22.5	>Plk1-276->Plk1-486
2	A, B, P, Mg-ATP	1:1:1	300	80-90	ETD+HCD	4	2213.25	1	EKEEPVVR	2	370	>Plk1	984.524	9.5	3.35602e-17	SLLLKPHQR	5	103	>Plk1	1090.66	10.5	5.57784e-19	20	>Plk1-103->Plk1-370
2	A, B, P, Mg-ATP	1:1:1	300	80-90	ETD+HCD	3	2063.2	1	KPLTVLNK	1	350	>Plk1	911.58	8	5.86754e-15	KALTEPEAR	1	158	>Plk1	1013.55	10	5.57784e-19	18	>Plk1-158->Plk1-350
2	A, B, P, Mg-ATP	1:1:1	300	80-90	ETD+HCD	3	2348.09	4	GAASpMoMGDVK	1	1	>Bora_NT	1061.39	7	5.53684e-12	TMVDKLLSSR	5	601	>Plk1	1148.62	10	3.72619e-19	17	>Bora_NT-1->Plk1-601
2	A, B, P, Mg-ATP	1:1:1	300	80-90	ETD+HCD	4	2241.19	1	SASpNRLKAS	7	613	>Plk1	1012.47	7	7.00255e-14	SLLLKPHQR	5	103	>Plk1	1090.66	7	3.35975e-14	14	>Plk1-103->Plk1-613
2	A, B, P, Mg-ATP	1:1:1	300	80-90	EThcD	4	3433.91	2	SLLLKPHQR	5	103	>Plk1	1090.66	12.5	3.08608e-23	APADPGKAGVPGVAAPGAPAAAPPAK	7	31	>Plk1	2205.19	44.5	6.1263e-56	57	>Plk1-103->Plk1-31
2	A, B, P, Mg-ATP	1:1:1	300	80-90	EThcD	4	3582.91	3	IKKNEYSIPK	2	276	>Plk1	1218.7	19.5	6.05052e-42	KKTpLCGTPNYIAPEVLSKK	18	237	>Plk1	2226.15	29	3.8003e-60	48.5	>Plk1-237->Plk1-276
2	A, B, P, Mg-ATP	1:1:1	300	80-90	EThcD	4	3491.87	1	TMVDKLLSSR	5	601	>Plk1	1148.62	13	2.7932e-26	APADPGKAGVPGVAAPGAPAAAPPAK	7	31	>Plk1	2205.19	35	2.96078e-58	48	>Plk1-31->Plk1-601
2	A, B, P, Mg-ATP	1:1:1	300	80-90	EThcD	4	3401.83	2	KALTEPEAR	1	158	>Plk1	1013.55	18	5.536e-38	KPLTpVLNKGLENPLPERPR	8	357	>Plk1	2250.22	27	6.06189e-52	45	>Plk1-158->Plk1-357
2	A, B, P, Mg-ATP	1:1:1	300	80-90	EThcD	4	3356.8	1	KALTEPEAR	1	158	>Plk1	1013.55	11	1.63852e-24	APADPGKAGVPGVAAPGAPAAAPPAK	7	31	>Plk1	2205.19	31	2.25121e-63	42	>Plk1-158->Plk1-31
2	A, B, P, Mg-ATP	1:1:1	300	80-90	EThcD	4	3225.67	3	SLLELHKR	7	155	>Plk1	994.592	8	4.57853e-15	DGTESYLTVSSHPNSLMKK	18	486	>Plk1	2093.01	33	5.23701e-60	41	>Plk1-155->Plk1-486
2	A, B, P, Mg-ATP	1:1:1	300	80-90	EThcD	5	3561.95	1	IKKNEYSIPK	2	276	>Plk1	1218.7	8	1.34532e-15	APADPGKAGVPGVAAPGAPAAAPPAK	7	31	>Plk1	2205.19	32	1.22847e-60	40	>Plk1-276->Plk1-31
2	A, B, P, Mg-ATP	1:1:1	300	80-90	EThcD	5	4619.33	1	APADPGKAGVPGVAAPGAPAAAPPAK	7	31	>Plk1	2205.19	19.5	6.05268e-37	GGFAKCFEISDADTKEVFAGK	5	78	>Plk1	2276.08	20	3.90078e-41	39.5	>Plk1-31->Plk1-78
2	A, B, P, Mg-ATP	1:1:1	300	80-90	EThcD	5	3702.92	2	EKMSMEISIHR	2	109	>Plk1	1359.66	9	8.35373e-18	APADPGKAGVPGVAAPGAPAAAPPAK	7	31	>Plk1	2205.19	30	3.3348e-61	39	>Plk1-109->Plk1-31
2	A, B, P, Mg-ATP	1:1:1	300	80-90	EThcD	3	2316.23	6	KALTEPEAR	1	158	>Plk1	1013.55	18.5	8.12192e-38	TMoVDKLLSSR	5	601	>Plk1	1164.62	20.5	4.24044e-41	39	>Plk1-158->Plk1-601
2	A, B, P, Mg-ATP	1:1:1	300	80-90	EThcD	4	3244.62	1	KALTEPEAR	1	158	>Plk1	1013.55	10	1.54148e-19	DGTESYLTVSSHPNSLMKK	18	486	>Plk1	2093.01	29	4.20255e-59	39	>Plk1-158->Plk1-486
2	A, B, P, Mg-ATP	1:1:1	300	80-90	EThcD	5	3155.64	2	SLLLKPHQR	5	103	>Plk1	1090.66	9	6.52168e-17	LSLLEEYGCCKELASR	11	586	>Plk1	1926.92	28	1.01079e-57	37	>Plk1-103->Plk1-586
2	A, B, P, Mg-ATP	1:1:1	300	80-90	EThcD	4	4270.16	1	LSLLEEYGCCKELASR	11	586	>Plk1	1926.92	15	1.25127e-29	APADPGKAGVPGVAAPGAPAAAPPAK	7	31	>Plk1	2205.19	22	4.33306e-42	37	>Plk1-31->Plk1-586
2	A, B, P, Mg-ATP	1:1:1	300	80-90	EThcD	4	3529.88	7	TMVDKLLSSR	5	601	>Plk1	1148.62	14.5	1.71849e-29	GLENPLPERPREKEEPVVR	13	370	>Plk1	2243.2	21.5	1.124e-41	36	>Plk1-370->Plk1-601
2	A, B, P, Mg-ATP	1:1:1	300	80-90	EThcD	4	3078.54	1	KALTEPEAR	1	158	>Plk1	1013.55	12.5	4.75488e-24	LSLLEEYGCCKELASR	11	586	>Plk1	1926.92	22.5	1.04531e-43	35	>Plk1-158->Plk1-586
2	A, B, P, Mg-ATP	1:1:1	300	80-90	EThcD	5	2604.38	8	SLLLKPHQR	5	103	>Plk1	1090.66	16.5	3.97523e-31	EKMoSMEISIHR	2	109	>Plk1	1375.66	18.5	1.35914e-33	35	>Plk1-103->Plk1-109
2	A, B, P, Mg-ATP	1:1:1	300	80-90	EThcD	3	2204.26	2	KALTEPEAR	1	158	>Plk1	1013.55	19	6.48699e-40	ITLLKYFR	5	492	>Plk1	1052.64	15	6.47808e-31	34	>Plk1-158->Plk1-492
2	A, B, P, Mg-ATP	1:1:1	300	80-90	EThcD	3	2136.14	4	EKEEPVVR	2	370	>Plk1	984.524	15.5	2.55902e-31	KALTEPEAR	1	158	>Plk1	1013.55	17.5	1.93424e-35	33	>Plk1-158->Plk1-370
2	A, B, P, Mg-ATP	1:1:1	300	80-90	EThcD	4	2458.41	8	KALTEPEAR	1	158	>Plk1	1013.55	15.5	1.15644e-29	RSLLELHKRR	8	155	>Plk1	1306.79	17.5	1.17735e-33	33	>Plk1-155->Plk1-158
2	A, B, P, Mg-ATP	1:1:1	300	80-90	EThcD	3	2164.08	1	SASpNRLKAS	7	613	>Plk1	1012.47	13	5.22176e-25	KALTEPEAR	1	158	>Plk1	1013.55	19	3.65726e-40	32	>Plk1-158->Plk1-613
2	A, B, P, Mg-ATP	1:1:1	300	80-90	EThcD	5	3393.74	2	SASpNRLKAS	7	613	>Plk1	1012.47	11	3.02566e-21	GLENPLPERPREKEEPVVR	13	370	>Plk1	2243.2	21	7.02687e-40	32	>Plk1-370->Plk1-613
2	A, B, P, Mg-ATP	1:1:1	300	80-90	EThcD	5	3372.81	1	EKEEPVVR	2	370	>Plk1	984.524	9.5	3.55896e-17	KPLTpVLNKGLENPLPERPR	8	357	>Plk1	2250.22	22.5	1.18204e-40	32	>Plk1-357->Plk1-370
2	A, B, P, Mg-ATP	1:1:1	300	80-90	EThcD	5	2365.37	4	SLLLKPHQR	5	103	>Plk1	1090.66	16	4.14094e-34	GRFLGKGGFAK	6	73	>Plk1	1136.65	15	2.63188e-30	31	>Plk1-103->Plk1-73
2	A, B, P, Mg-ATP	1:1:1	300	80-90	EThcD	5	3618.75	1	TMVDKLLSSR	5	601	>Plk1	1148.62	16	1.81671e-34	QALYLSpHSpRIDKDVEDKR	12	95	>Bora_NT	2332.06	15	1.89717e-27	31	>Bora_NT-95->Plk1-601
2	A, B, P, Mg-ATP	1:1:1	300	80-90	EThcD	3	2297.28	6	SLLELHKR	7	155	>Plk1	994.592	13.5	8.70703e-27	TMoVDKLLSSR	5	601	>Plk1	1164.62	17.5	2.05335e-34	31	>Plk1-155->Plk1-601
2	A, B, P, Mg-ATP	1:1:1	300	80-90	EThcD	4	3065.59	1	KALTEPEAR	1	158	>Plk1	1013.55	12.5	2.5298e-25	NYMSEHLLKAGANITPR	9	504	>Plk1	1913.98	18.5	8.58517e-36	31	>Plk1-158->Plk1-504
2	A, B, P, Mg-ATP	1:1:1	300	80-90	EThcD	3	2198.27	1	KPLTVLNK	1	350	>Plk1	911.58	14.5	1.08519e-28	TMVDKLLSSR	5	601	>Plk1	1148.62	16.5	4.69238e-32	31	>Plk1-350->Plk1-601
2	A, B, P, Mg-ATP	1:1:1	300	80-90	EThcD	3	2143.17	1	KPLTpVLNK	1	350	>Plk1	991.547	13	3.2024e-24	KALTEPEAR	1	158	>Plk1	1013.55	18	9.26367e-36	31	>Plk1-158->Plk1-350
2	A, B, P, Mg-ATP	1:1:1	300	80-90	EThcD	4	2377.35	4	SLLLKPHQR	5	103	>Plk1	1090.66	14	7.43298e-27	TMVDKLLSSR	5	601	>Plk1	1148.62	17	4.33134e-33	31	>Plk1-103->Plk1-601
2	A, B, P, Mg-ATP	1:1:1	300	80-90	EThcD	5	3292.85	1	KPLTVLNK	1	350	>Plk1	911.58	11	1.02869e-22	GLENPLPERPREKEEPVVR	13	370	>Plk1	2243.2	19	4.81047e-36	30	>Plk1-350->Plk1-370
2	A, B, P, Mg-ATP	1:1:1	300	80-90	EThcD	4	2505.38	1	TMVDKLLSSR	5	601	>Plk1	1148.62	18	3.60841e-38	IKKNEYSIPK	2	276	>Plk1	1218.7	11	2.7543e-21	29	>Plk1-276->Plk1-601
2	A, B, P, Mg-ATP	1:1:1	300	80-90	EThcD	3	2315.15	4	SpASNRLKAS	7	613	>Plk1	1012.47	9	3.01719e-16	TMoVDKLLSSR	5	601	>Plk1	1164.62	20	3.01929e-41	29	>Plk1-601->Plk1-613
2	A, B, P, Mg-ATP	1:1:1	300	80-90	EThcD	4	2269.31	2	SLLELHKR	7	155	>Plk1	994.592	12	4.61983e-24	GRFLGKGGFAK	6	73	>Plk1	1136.65	15	2.89337e-29	27	>Plk1-155->Plk1-73
2	A, B, P, Mg-ATP	1:1:1	300	80-90	EThcD	4	2117.18	2	EKEEPVVR	2	370	>Plk1	984.524	12	1.02899e-22	SLLELHKR	7	155	>Plk1	994.592	12	1.02899e-22	24	>Plk1-155->Plk1-370
2	A, B, P, Mg-ATP	1:1:1	300	80-90	EThcD	4	2873.47	1	SLLLKPHQR	5	103	>Plk1	1090.66	7	7.80507e-14	GGFAKCFEISDADTK	5	78	>Plk1	1644.75	16	6.90995e-33	23	>Plk1-103->Plk1-78
2	A, B, P, Mg-ATP	1:1:1	300	80-90	EThcD	4	4112.12	1	IGDFGLATKVEYDGER	9	212	>Plk1	1768.86	12	3.78386e-25	APADPGKAGVPGVAAPGAPAAAPPAK	7	31	>Plk1	2205.19	10	3.41984e-18	22	>Plk1-212->Plk1-31
2	A, B, P, Mg-ATP	1:1:1	300	70-80	EThcD	4	3582.91	3	IKKNEYSIPK	2	276	>Plk1	1218.7	18	1.32096e-37	KKTpLCGTPNYIAPEVLSKK	18	237	>Plk1	2226.15	33.5	1.41886e-59	51.5	>Plk1-237->Plk1-276
2	A, B, P, Mg-ATP	1:1:1	300	70-80	EThcD	4	3356.81	2	KALTEPEAR	1	158	>Plk1	1013.55	13	1.82211e-27	APADPGKAGVPGVAAPGAPAAAPPAK	7	31	>Plk1	2205.19	38	2.66273e-59	51	>Plk1-158->Plk1-31
2	A, B, P, Mg-ATP	1:1:1	300	70-80	EThcD	4	3433.92	2	SLLLKPHQR	5	103	>Plk1	1090.66	9	5.18177e-17	APADPGKAGVPGVAAPGAPAAAPPAK	7	31	>Plk1	2205.19	37	2.85042e-57	46	>Plk1-103->Plk1-31
2	A, B, P, Mg-ATP	1:1:1	300	70-80	EThcD	4	3065.59	4	KALTEPEAR	1	158	>Plk1	1013.55	15	1.11337e-30	NYMSEHLLKAGANITPR	9	504	>Plk1	1913.98	29	8.53344e-59	44	>Plk1-158->Plk1-504
2	A, B, P, Mg-ATP	1:1:1	300	70-80	EThcD	4	3321.74	4	SLLLKPHQR	5	103	>Plk1	1090.66	9	2.36439e-17	DGTESYLTVSSHPNSLMKK	18	486	>Plk1	2093.01	34	2.94882e-61	43	>Plk1-103->Plk1-486
2	A, B, P, Mg-ATP	1:1:1	300	70-80	EThcD	5	3561.96	1	IKKNEYSIPK	2	276	>Plk1	1218.7	9.5	6.39535e-18	APADPGKAGVPGVAAPGAPAAAPPAK	7	31	>Plk1	2205.19	33.5	1.22847e-60	43	>Plk1-276->Plk1-31
2	A, B, P, Mg-ATP	1:1:1	300	70-80	EThcD	3	2300.24	7	KALTEPEAR	1	158	>Plk1	1013.55	21.5	7.96592e-43	TMVDKLLSSR	5	601	>Plk1	1148.62	19.5	3.8567e-37	41	>Plk1-158->Plk1-601
2	A, B, P, Mg-ATP	1:1:1	300	70-80	EThcD	4	3215.59	1	EKEEPVVR	2	370	>Plk1	984.524	9	4.58927e-17	DGTESYLTVSSHPNSLMKK	18	486	>Plk1	2093.01	32	2.37744e-59	41	>Plk1-370->Plk1-486
2	A, B, P, Mg-ATP	1:1:1	300	70-80	EThcD	5	3734.91	3	EKMoSMoEISIHR	2	109	>Plk1	1391.65	11	4.17044e-22	APADPGKAGVPGVAAPGAPAAAPPAK	7	31	>Plk1	2205.19	29	2.16191e-60	40	>Plk1-109->Plk1-31
2	A, B, P, Mg-ATP	1:1:1	300	70-80	EThcD	4	3243.55	1	SASpNRLKAS	7	613	>Plk1	1012.47	9	4.04743e-16	DGTESYLTVSSHPNSLMKK	18	486	>Plk1	2093.01	30	7.45059e-59	39	>Plk1-486->Plk1-613
2	A, B, P, Mg-ATP	1:1:1	300	70-80	EThcD	4	3429.9	1	EVFAGKIVPK	6	94	>Plk1	1086.64	13	2.84059e-27	APADPGKAGVPGVAAPGAPAAAPPAK	7	31	>Plk1	2205.19	25.5	2.03402e-48	38.5	>Plk1-31->Plk1-94
2	A, B, P, Mg-ATP	1:1:1	300	70-80	EThcD	4	3507.87	2	TMoVDKLLSSR	5	601	>Plk1	1164.62	13	1.11979e-28	APADPGKAGVPGVAAPGAPAAAPPAK	7	31	>Plk1	2205.19	25	3.79876e-52	38	>Plk1-31->Plk1-601
2	A, B, P, Mg-ATP	1:1:1	300	70-80	EThcD	4	3225.68	3	SLLELHKR	7	155	>Plk1	994.592	8	3.23449e-15	DGTESYLTVSSHPNSLMKK	18	486	>Plk1	2093.01	29	2.01538e-58	37	>Plk1-155->Plk1-486
2	A, B, P, Mg-ATP	1:1:1	300	70-80	EThcD	5	2604.39	8	SLLLKPHQR	5	103	>Plk1	1090.66	13.5	1.43015e-25	EKMoSMEISIHR	2	109	>Plk1	1375.66	23.5	2.02157e-47	37	>Plk1-103->Plk1-109
2	A, B, P, Mg-ATP	1:1:1	300	70-80	EThcD	4	3244.62	1	KALTEPEAR	1	158	>Plk1	1013.55	12	3.13422e-25	DGTESYLTVSSHPNSLMKK	18	486	>Plk1	2093.01	24	4.42812e-49	36	>Plk1-158->Plk1-486
2	A, B, P, Mg-ATP	1:1:1	300	70-80	EThcD	3	2146.21	10	SLLELHKR	7	155	>Plk1	994.592	17	1.05647e-34	KALTEPEAR	1	158	>Plk1	1013.55	19	1.24114e-38	36	>Plk1-155->Plk1-158
2	A, B, P, Mg-ATP	1:1:1	300	70-80	EThcD	4	2204.26	2	KALTEPEAR	1	158	>Plk1	1013.55	18.5	1.81567e-36	ITLLKYFR	5	492	>Plk1	1052.64	16.5	1.65619e-32	35	>Plk1-158->Plk1-492
2	A, B, P, Mg-ATP	1:1:1	300	70-80	EThcD	3	2164.09	2	SASpNRLKAS	7	613	>Plk1	1012.47	13.5	2.63512e-24	KALTEPEAR	1	158	>Plk1	1013.55	21.5	4.51001e-44	35	>Plk1-158->Plk1-613
2	A, B, P, Mg-ATP	1:1:1	300	70-80	EThcD	3	2152.25	6	FLGKGGFAK	4	73	>Plk1	923.523	19	5.10742e-39	SLLLKPHQR	5	103	>Plk1	1090.66	15	1.91766e-29	34	>Plk1-103->Plk1-73
2	A, B, P, Mg-ATP	1:1:1	300	70-80	EThcD	3	2136.14	4	EKEEPVVR	2	370	>Plk1	984.524	13.5	5.02316e-26	KALTEPEAR	1	158	>Plk1	1013.55	20.5	2.60576e-42	34	>Plk1-158->Plk1-370
2	A, B, P, Mg-ATP	1:1:1	300	70-80	EThcD	4	2505.38	2	TMVDKLLSSR	5	601	>Plk1	1148.62	19	1.01833e-39	IKKNEYSIPK	2	276	>Plk1	1218.7	13	2.68905e-25	32	>Plk1-276->Plk1-601
2	A, B, P, Mg-ATP	1:1:1	300	70-80	EThcD	5	3545.88	5	TMoVDKLLSSR	5	601	>Plk1	1164.62	15	1.19843e-30	GLENPLPERPREKEEPVVR	13	370	>Plk1	2243.2	17	1.57588e-31	32	>Plk1-370->Plk1-601
2	A, B, P, Mg-ATP	1:1:1	300	70-80	EThcD	5	3393.74	4	SASpNRLKAS	7	613	>Plk1	1012.47	11	4.37143e-21	GLENPLPERPREKEEPVVR	13	370	>Plk1	2243.2	21	1.41836e-39	32	>Plk1-370->Plk1-613
2	A, B, P, Mg-ATP	1:1:1	300	70-80	EThcD	5	3401.84	1	KALTEPEAR	1	158	>Plk1	1013.55	12	4.42101e-25	KPLTpVLNKGLENPLPERPR	8	357	>Plk1	2250.22	19	1.84721e-36	31	>Plk1-158->Plk1-357
2	A, B, P, Mg-ATP	1:1:1	300	70-80	EThcD	3	2198.27	2	KPLTVLNK	1	350	>Plk1	911.58	14	5.92356e-28	TMVDKLLSSR	5	601	>Plk1	1148.62	17	1.47326e-33	31	>Plk1-350->Plk1-601
2	A, B, P, Mg-ATP	1:1:1	300	70-80	EThcD	3	2315.15	7	SpASNRLKAS	7	613	>Plk1	1012.47	11	5.80929e-20	TMoVDKLLSSR	5	601	>Plk1	1164.62	20	5.4483e-40	31	>Plk1-601->Plk1-613
2	A, B, P, Mg-ATP	1:1:1	300	70-80	EThcD	3	2297.27	6	SLLELHKR	7	155	>Plk1	994.592	11.5	2.14726e-23	TMoVDKLLSSR	5	601	>Plk1	1164.62	17.5	1.36589e-36	29	>Plk1-155->Plk1-601
2	A, B, P, Mg-ATP	1:1:1	300	70-80	EThcD	4	2616.37	1	EVFAGKIVPK	6	94	>Plk1	1086.64	13	1.95967e-25	EKMoSMoEISIHR	2	109	>Plk1	1391.65	15.5	1.87562e-28	28.5	>Plk1-109->Plk1-94
2	A, B, P, Mg-ATP	1:1:1	300	70-80	EThcD	4	2377.35	5	SLLLKPHQR	5	103	>Plk1	1090.66	10	3.92838e-19	TMVDKLLSSR	5	601	>Plk1	1148.62	17	4.08635e-35	27	>Plk1-103->Plk1-601
2	A, B, P, Mg-ATP	1:1:1	300	70-80	EThcD	4	2063.19	1	KPLTVLNK	1	350	>Plk1	911.58	12	6.40538e-24	KALTEPEAR	1	158	>Plk1	1013.55	14	5.34434e-28	26	>Plk1-158->Plk1-350
2	A, B, P, Mg-ATP	1:1:1	300	70-80	EThcD	4	2269.3	4	SLLELHKR	7	155	>Plk1	994.592	13	2.90728e-26	GRFLGKGGFAK	6	73	>Plk1	1136.65	13	1.79131e-24	26	>Plk1-155->Plk1-73
2	A, B, P, Mg-ATP	1:1:1	300	70-80	EThcD	3	2034.17	2	KPLTVLNK	1	350	>Plk1	911.58	11.5	2.83378e-22	EKEEPVVR	2	370	>Plk1	984.524	13.5	3.9772e-27	25	>Plk1-350->Plk1-370
2	A, B, P, Mg-ATP	1:1:1	300	70-80	EThcD	4	2117.18	3	EKEEPVVR	2	370	>Plk1	984.524	12	4.2547e-22	SLLELHKR	7	155	>Plk1	994.592	12	4.2547e-22	24	>Plk1-155->Plk1-370
2	A, B, P, Mg-ATP	1:1:1	300	70-80	EThcD	4	2281.37	2	ITLLKYFR	5	492	>Plk1	1052.64	12	2.98521e-23	SLLLKPHQR	5	103	>Plk1	1090.66	11	2.1079e-20	23	>Plk1-103->Plk1-492
2	A, B, P, Mg-ATP	1:1:1	300	70-80	EThcD	4	2315.37	1	EVFAGKIVPK	6	94	>Plk1	1086.64	11.5	1.77222e-21	SLLLKPHQR	5	103	>Plk1	1090.66	9.5	2.48145e-17	21	>Plk1-103->Plk1-94
3	A, B, P	1:1:1	300	70-80	EThcD	4	3433.92	2	SLLLKPHQR	5	103	>Plk1	1090.66	9.5	2.40426e-17	APADPGKAGVPGVAAPGAPAAAPPAK	7	31	>Plk1	2205.19	38.5	4.01755e-58	48	>Plk1-103->Plk1-31
3	A, B, P	1:1:1	300	70-80	EThcD	4	3356.81	1	KALTEPEAR	1	158	>Plk1	1013.55	10	3.36187e-20	APADPGKAGVPGVAAPGAPAAAPPAK	7	31	>Plk1	2205.19	35	2.19539e-59	45	>Plk1-158->Plk1-31
3	A, B, P	1:1:1	300	70-80	EThcD	5	3702.92	2	EKMSMEISIHR	2	109	>Plk1	1359.66	9.5	1.27739e-17	APADPGKAGVPGVAAPGAPAAAPPAK	7	31	>Plk1	2205.19	32.5	8.1189e-61	42	>Plk1-109->Plk1-31
3	A, B, P	1:1:1	300	70-80	EThcD	4	2585.26	1	LTIHSEKSD	7	154	>Bora_NT	1028.51	15.5	1.35078e-29	CTNINSDSPVGKK	12	146	>Bora_NT	1418.68	21.5	8.12299e-41	37	>Bora_NT-146->Bora_NT-154
3	A, B, P	1:1:1	300	70-80	EThcD	4	3491.88	1	TMVDKLLSSR	5	601	>Plk1	1148.62	10	9.28525e-21	APADPGKAGVPGVAAPGAPAAAPPAK	7	31	>Plk1	2205.19	26	1.08304e-52	36	>Plk1-31->Plk1-601
3	A, B, P	1:1:1	300	70-80	EThcD	5	3493.95	1	SLLELHKRR	7	155	>Plk1	1150.69	8.5	2.59227e-16	APADPGKAGVPGVAAPGAPAAAPPAK	7	31	>Plk1	2205.19	25.5	3.36752e-50	34	>Plk1-155->Plk1-31
3	A, B, P	1:1:1	300	70-80	EThcD	4	2494.3	1	IDKDVEDKR	8	100	>Bora_NT	1116.58	15.5	3.1764e-29	QKAIEEFFTK	2	103	>Bora_NT	1239.65	18.5	1.66692e-35	34	>Bora_NT-100->Bora_NT-103
3	A, B, P	1:1:1	300	70-80	EThcD	5	2620.38	5	SLLLKPHQR	5	103	>Plk1	1090.66	12.5	5.39609e-23	EKMoSMoEISIHR	2	109	>Plk1	1391.65	21.5	2.23629e-41	34	>Plk1-103->Plk1-109
3	A, B, P	1:1:1	300	70-80	EThcD	4	2219.2	13	SASNRLKAS	7	613	>Plk1	932.504	13	1.5411e-25	TMVDKLLSSR	5	601	>Plk1	1148.62	20	1.14339e-41	33	>Plk1-601->Plk1-613
3	A, B, P	1:1:1	300	70-80	EThcD	4	2308.22	1	ATAPVGGPKR	9	25	>AurA	952.545	15	3.60083e-30	SKENCISGPVK	2	7	>AurA	1217.61	16	6.48426e-32	31	>AurA-25->AurA-7
3	A, B, P	1:1:1	300	70-80	EThcD	5	2365.37	6	SLLLKPHQR	5	103	>Plk1	1090.66	15	3.3191e-31	GRFLGKGGFAK	6	73	>Plk1	1136.65	15	6.65897e-30	30	>Plk1-103->Plk1-73
3	A, B, P	1:1:1	300	70-80	EThcD	3	2271.21	3	EKEEPVVR	2	370	>Plk1	984.524	13	5.06634e-26	TMVDKLLSSR	5	601	>Plk1	1148.62	17	4.0888e-34	30	>Plk1-370->Plk1-601
3	A, B, P	1:1:1	300	70-80	EThcD	4	2302.31	4	SLLELHKR	7	155	>Plk1	994.592	14	5.07795e-27	RKALTEPEAR	2	158	>Plk1	1169.65	15	6.78053e-28	29	>Plk1-155->Plk1-158
3	A, B, P	1:1:1	300	70-80	EThcD	3	2576.22	2	GAASMMGDVK	1	1	>Bora_NT	965.431	12.5	7.06032e-27	ESKMQITPETPGR	3	13	>Bora_NT	1472.73	11.5	4.90829e-23	24	>Bora_NT-1->Bora_NT-13
3	A, B, P	1:1:1	300	70-80	EThcD	4	2084.12	2	SASNRLKAS	7	613	>Plk1	932.504	8	4.40631e-15	KALTEPEAR	1	158	>Plk1	1013.55	13	8.62146e-27	21	>Plk1-158->Plk1-613
3	A, B, P	1:1:1	300	70-80	EThcD	3	1833.89	3	RSpMDR	1	1	>AurA	743.279	10.5	3.79188e-21	ATAPVGGPKR	9	25	>AurA	952.545	8.5	1.61609e-14	19	>AurA-1->AurA-25
4	A, B, Mg-ATP	1:2	60	60-70	EThcD	3	2468.1	3	GAASMMoGDVK	1	1	>Bora_NT	981.426	24.5	3.95245e-51	PSNCQNKESASK	7	398	>AurA	1348.6	26.5	3.09271e-55	51	>AurA-398->Bora_NT-1
4	A, B, Mg-ATP	1:2	60	60-70	EThcD	3	2148.06	3	GAASMMoGDVK	1	1	>Bora_NT	981.426	26	2.68047e-55	PLNNTQKSK	7	99	>AurA	1028.56	19	1.01833e-39	45	>AurA-99->Bora_NT-1
4	A, B, Mg-ATP	1:2	60	60-70	EThcD	3	2095.97	2	IDKDVEDK	3	95	>Bora_NT	960.476	15	3.12531e-31	GAASMoMoGDVK	1	1	>Bora_NT	997.421	26.5	3.89752e-55	41.5	>Bora_NT-1->Bora_NT-95
4	A, B, Mg-ATP	1:2	60	60-70	EThcD	3	2447.16	2	IDKDVEDK	3	95	>Bora_NT	960.476	16	1.04625e-33	PSNCQNKESASK	7	398	>AurA	1348.6	25.5	1.26116e-52	41.5	>AurA-398->Bora_NT-95
4	A, B, Mg-ATP	1:2	60	60-70	EThcD	4	2835.37	1	GAASMoMoGDVK	1	1	>Bora_NT	997.421	17.5	4.77328e-35	LVSpSHKPVQNQKQK	12	77	>AurA	1699.88	23	6.6698e-48	40.5	>AurA-77->Bora_NT-1
4	A, B, Mg-ATP	1:2	60	60-70	EThcD	3	2072.04	5	ATAPVGGPKR	9	25	>AurA	952.545	15	1.85328e-30	GAASMMoGDVK	1	1	>Bora_NT	981.426	25	1.07685e-54	40	>AurA-25->Bora_NT-1
4	A, B, Mg-ATP	1:2	60	60-70	EThcD	4	2975.41	1	PSNCQNKESASK	7	398	>AurA	1348.6	23	1.04218e-50	ESKMoQITPETPGR	3	13	>Bora_NT	1488.72	16	5.93408e-32	39	>AurA-398->Bora_NT-13
4	A, B, Mg-ATP	1:2	60	60-70	EThcD	3	2624.22	6	GAASMoMoGDVK	1	1	>Bora_NT	997.421	20.5	3.65373e-41	ESKMoQITPETPGR	3	13	>Bora_NT	1488.72	18.5	4.11809e-35	39	>Bora_NT-1->Bora_NT-13
4	A, B, Mg-ATP	1:2	60	60-70	EThcD	3	2063.03	1	STKLPTPGK	3	54	>Bora_NT	927.539	12.5	2.8136e-24	GAASMoMoGDVK	1	1	>Bora_NT	997.421	25.5	1.62065e-54	38	>Bora_NT-1->Bora_NT-54
4	A, B, Mg-ATP	1:2	60	60-70	EThcD	3	2114.95	3	RSpMoDR	1	1	>AurA	759.273	14	2.45552e-28	SKENCISGPVK	2	7	>AurA	1217.61	20	2.6462e-39	34	>AurA-1->AurA-7
4	A, B, Mg-ATP	1:2	60	60-70	EThcD	3	2579.22	2	GAASMoMoGDVK	1	1	>Bora_NT	997.421	17	7.24014e-35	LVSpSHKPVQNQK	6	71	>AurA	1443.72	16.5	6.85744e-32	33.5	>AurA-71->Bora_NT-1
4	A, B, Mg-ATP	1:2	60	60-70	EThcD	3	1878.77	6	RSpMDR	1	1	>AurA	743.279	10	2.39996e-20	GAASMoMoGDVK	1	1	>Bora_NT	997.421	23	3.69533e-47	33	>AurA-1->Bora_NT-1
4	A, B, Mg-ATP	1:2	60	60-70	EThcD	3	2353.1	2	GAASMoMoGDVK	1	1	>Bora_NT	997.421	16.5	4.91315e-34	SKENCISGPVK	2	7	>AurA	1217.61	15.5	4.18888e-32	32	>AurA-7->Bora_NT-1
4	A, B, Mg-ATP	1:2	60	60-70	EThcD	3	1979.99	1	ELQKLSK	4	226	>AurA	844.502	9.5	6.63026e-18	GAASMoMoGDVK	1	1	>Bora_NT	997.421	22	4.99585e-46	31.5	>AurA-226->Bora_NT-1
4	A, B, Mg-ATP	1:2	60	60-70	EThcD	3	1980.91	2	QKNEESK	2	121	>AurA	861.419	12	4.14967e-25	GAASMoMGDVK	1	1	>Bora_NT	981.426	19	2.37267e-39	31	>AurA-121->Bora_NT-1
4	A, B, Mg-ATP	1:2	60	60-70	EThcD	3	1857.82	1	RSpMoDR	1	1	>AurA	759.273	12	3.13961e-24	IDKDVEDK	3	95	>Bora_NT	960.476	18	4.57659e-38	30	>AurA-1->Bora_NT-95
4	A, B, Mg-ATP	1:2	60	60-70	EThcD	3	1989.99	2	ESASKQS	5	403	>AurA	735.34	8	1.37634e-14	IDKDVEDKR	3	95	>Bora_NT	1116.58	21	1.5102e-43	29	>AurA-403->Bora_NT-95
4	A, B, Mg-ATP	1:2	60	60-70	EThcD	3	3299.56	1	GAASMoMoGDVK	1	1	>Bora_NT	997.421	8	5.44636e-17	SKQPLPSAPENNPEEELASK	2	101	>AurA	2164.06	20	7.31731e-45	28	>AurA-101->Bora_NT-1
4	A, B, Mg-ATP	1:2	60	60-70	EThcD	3	1737.84	1	EKQSK	2	155	>AurA	618.334	7.5	5.77565e-14	GAASMMoGDVK	1	1	>Bora_NT	981.426	16	2.89669e-31	23.5	>AurA-155->Bora_NT-1
4	A, B, Mg-ATP	1:2	60	60-70	EThcD	3	2362.13	1	ESASKQS	5	403	>AurA	735.34	7	7.86812e-16	ESKMoQITPETPGR	3	13	>Bora_NT	1488.72	15	1.47203e-33	22	>AurA-403->Bora_NT-13
4	A, B, Mg-ATP	1:2	60	60-70	EThcD	4	1849.89	2	RSpMoDR	1	1	>AurA	759.273	6	2.64017e-11	ATAPVGGPKR	9	25	>AurA	952.545	15	7.41038e-31	21	>AurA-1->AurA-25
4	A, B, Mg-ATP	1:2	60	60-70	EThcD	3	1825.96	1	ESASKQS	5	403	>AurA	735.34	8	2.49342e-15	ATAPVGGPKR	9	25	>AurA	952.545	10	2.05893e-18	18	>AurA-25->AurA-403
